# Supplementary material
Source: publisher figshare collection journal article supplement (https://tandf.figshare.com/articles/dataset/_/25298707)
Supplement: Supplementary file 1 [file 1]

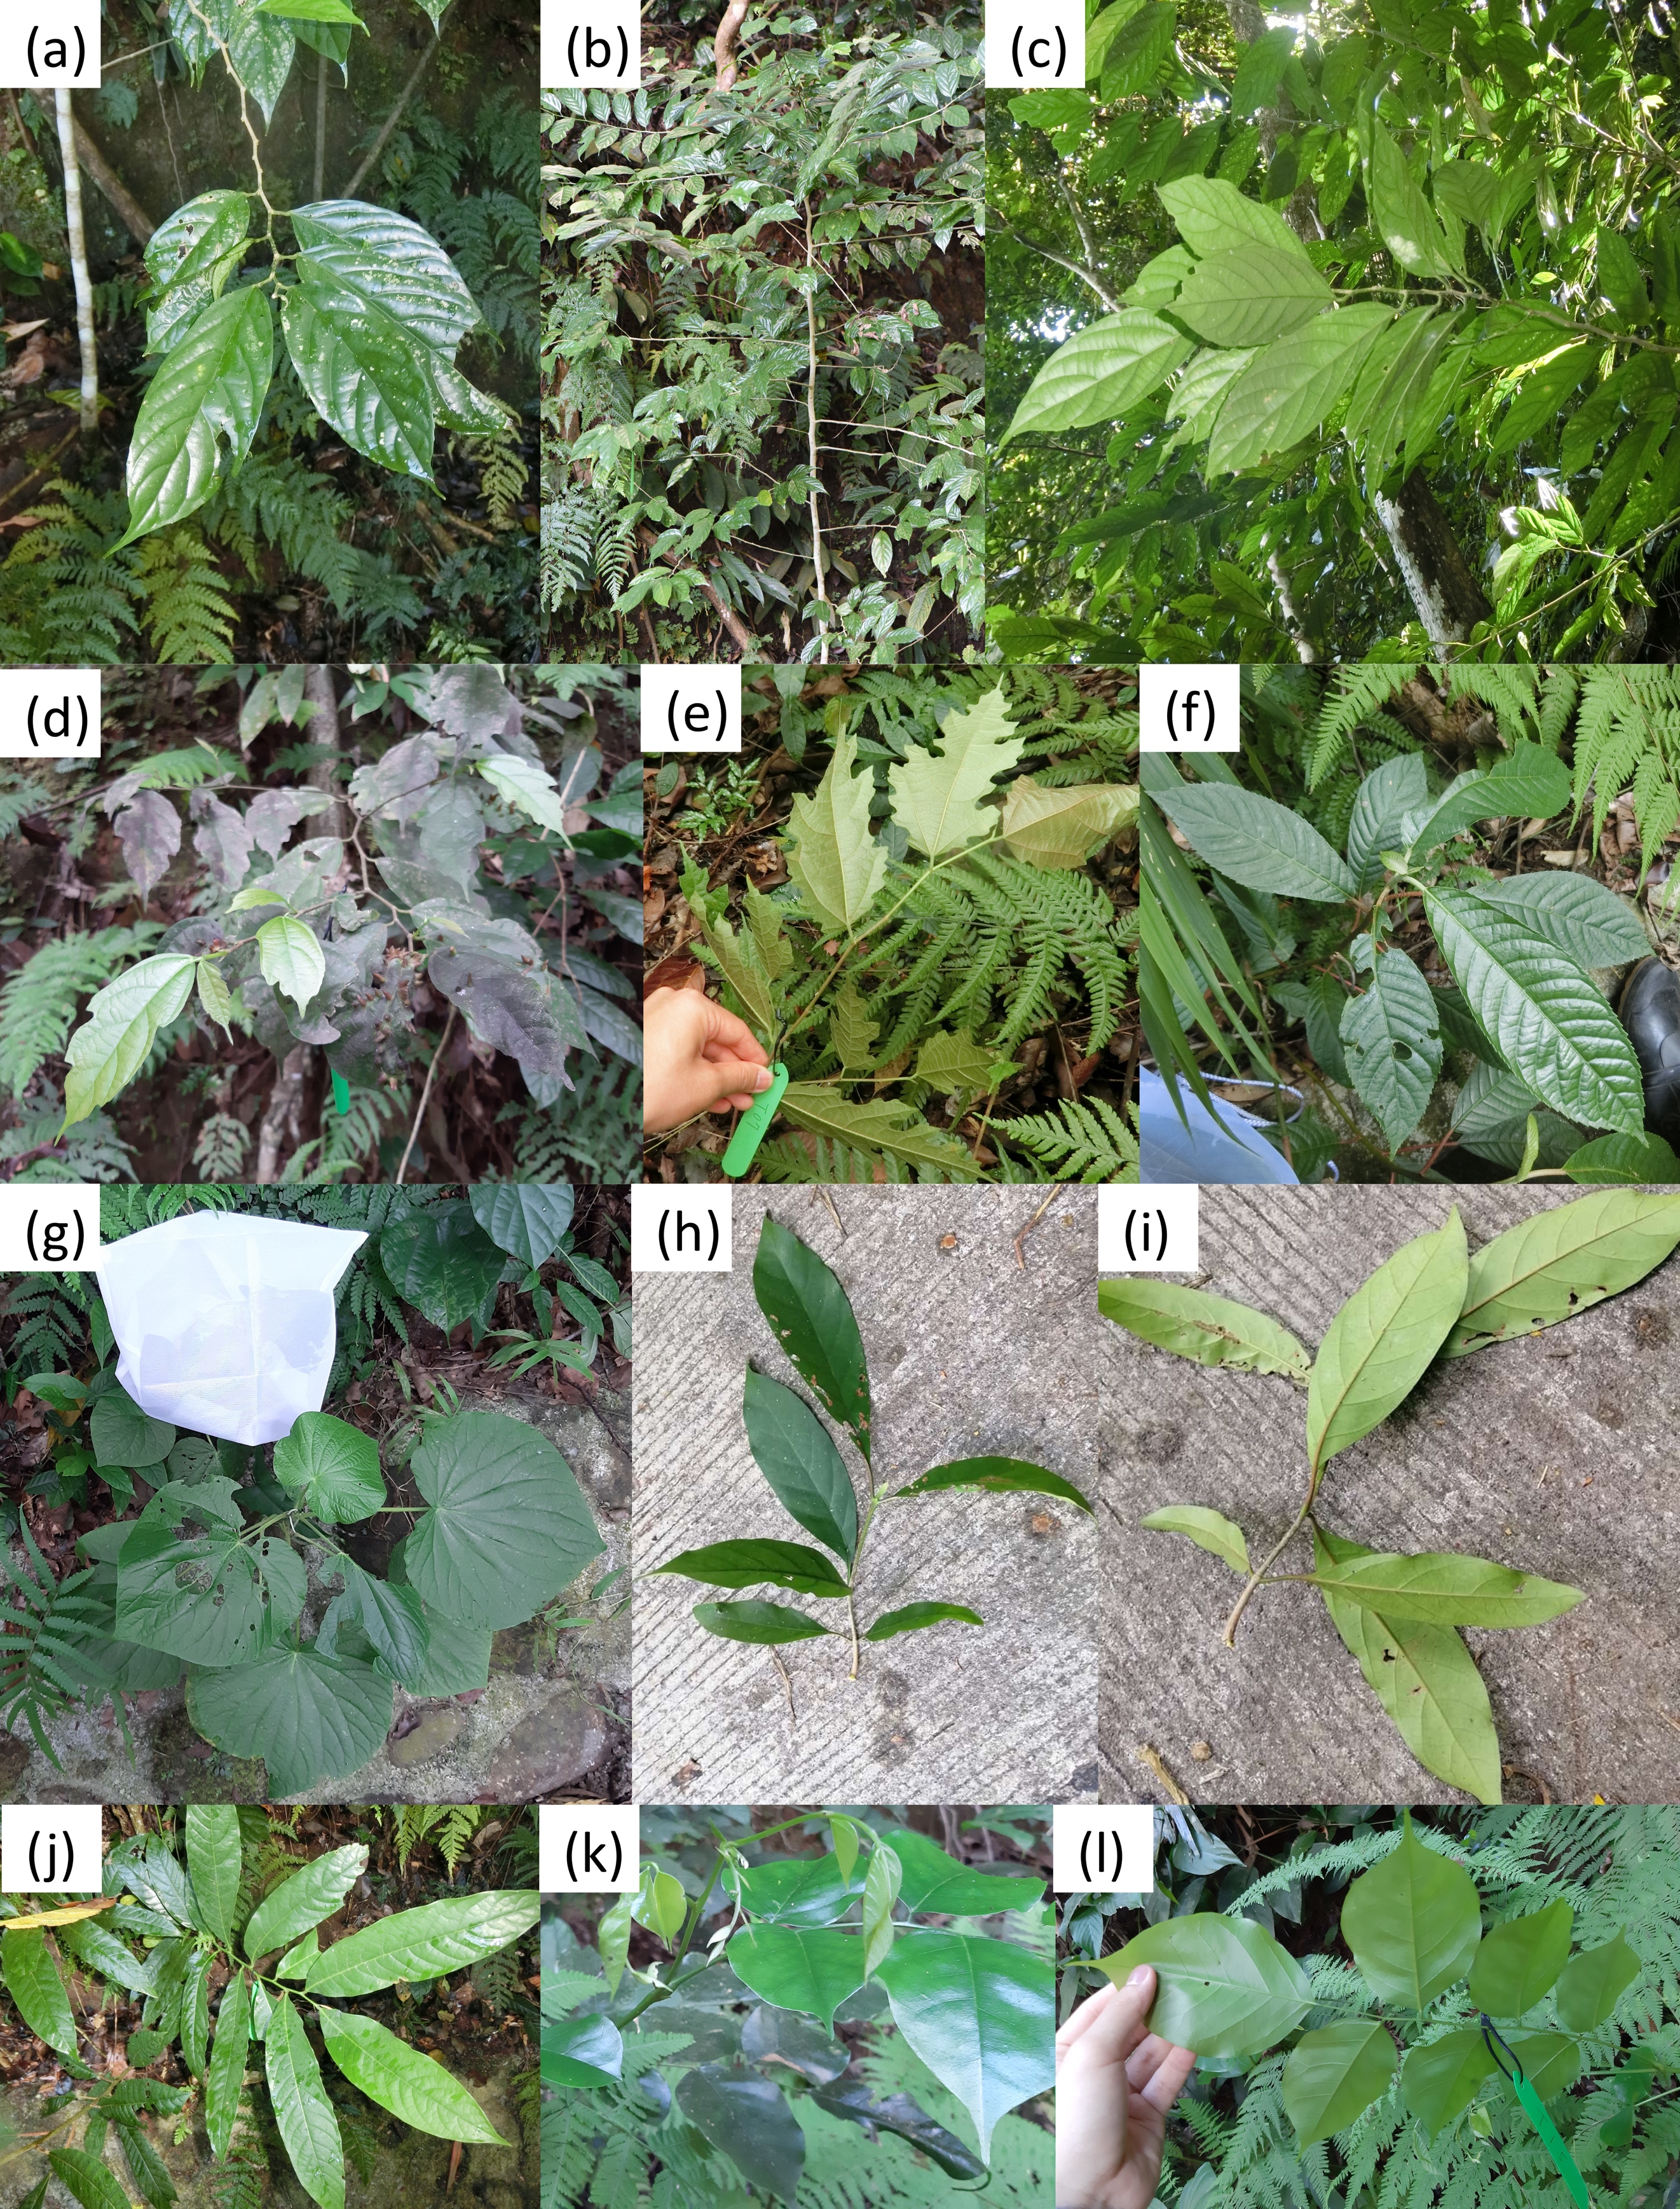


**Figure S1.** Host plants of *Pyrgonota bifoliata* in the Mt. Makiling Forest Reserve, Laguna, Luzon, Philippines. (a–c) *Alangium longiflorum* (Cornaceae), (d–e) *Ficus ulmifolia* (Moraceae), (f) *Saurauia latibractea* (Actinidiaceae), (g) *Piper umbellatum* (Piperaceae), (h–i) Rubiaceae, (j) Annonaceae, (k–l) *Pterocarpus indicus* (Fabaceae).
